# Supplementary material for: Lck is a relevant target in chronic lymphocytic leukaemia cells whose expression variance is unrelated to disease outcome
Source: PubMed Central journal article supplement (PMC5711840; doi:10.1038/s41598-017-17021-w), 2017-12-01
Supplement: 41598_2017_17021_MOESM1_ESM.pdf [file 41598_2017_17021_MOESM1_ESM.pdf]

# Supplementary Figures

**Lck is a relevant target in chronic lymphocytic leukaemia cells whose expression variance is unrelated to disease outcome**

Kathleen J Till, John C Allen, Fatima Talab, Ke Lin, David Allsup, Lynn Cawkwell, Alison Bentley, Ingo Ringshausen, Andrew D. Duckworth, Andrew R. Pettitt, Nagesh Kalakonda, Joseph R Slupsky

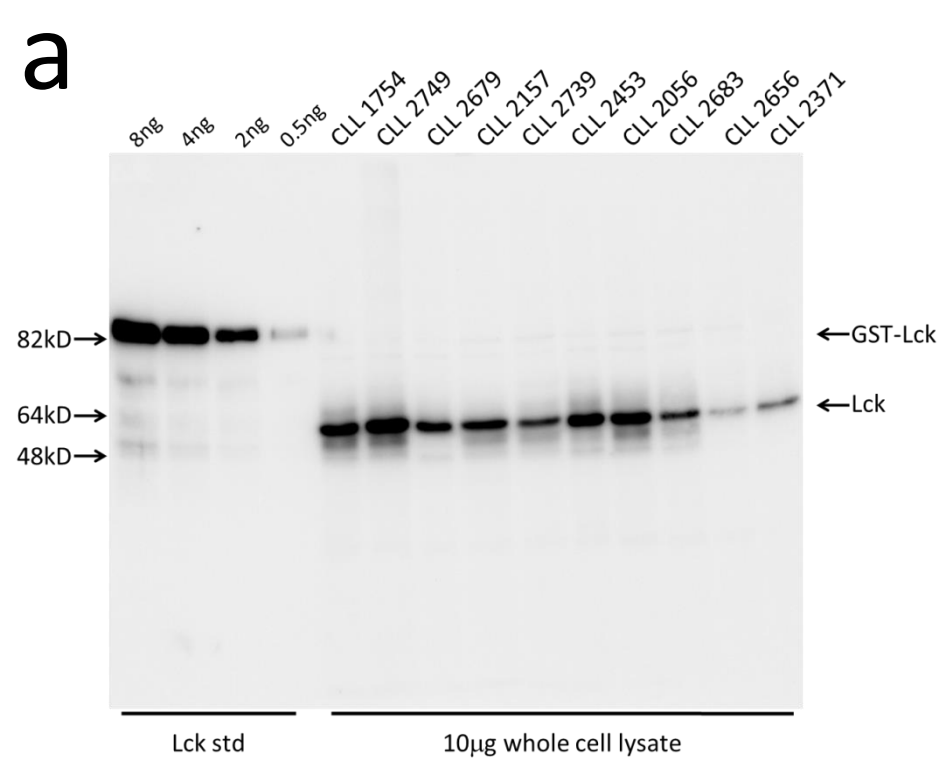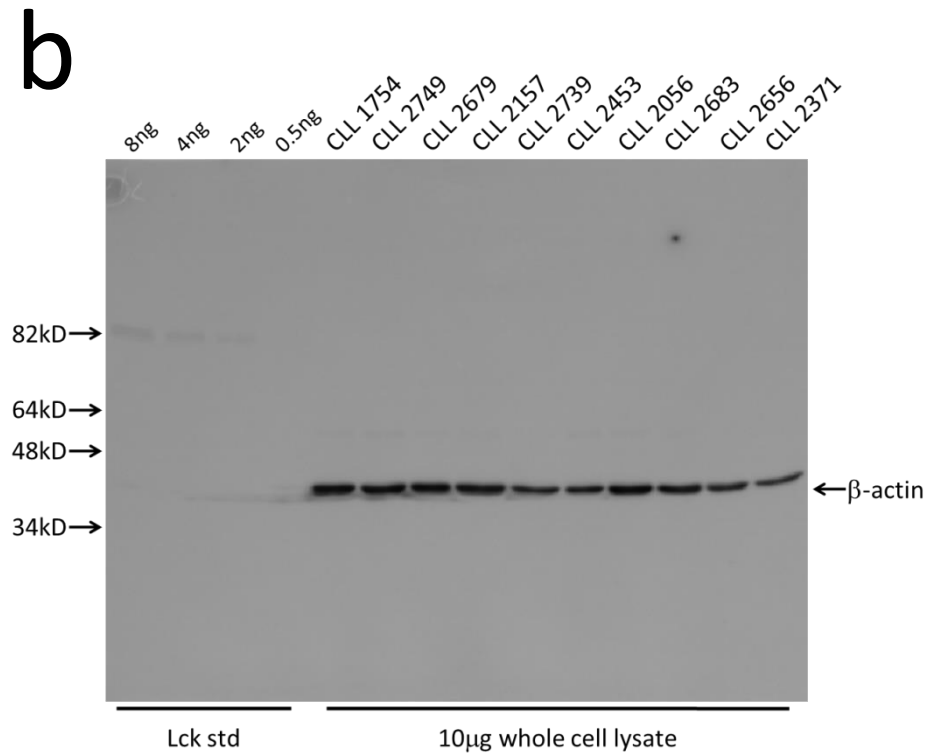

**Supplementary Figure 1.** Uncropped Western blots for **a.)** Lck and for **b.)**  $\beta$ -actin represented in manuscript Figure 1a.

**a**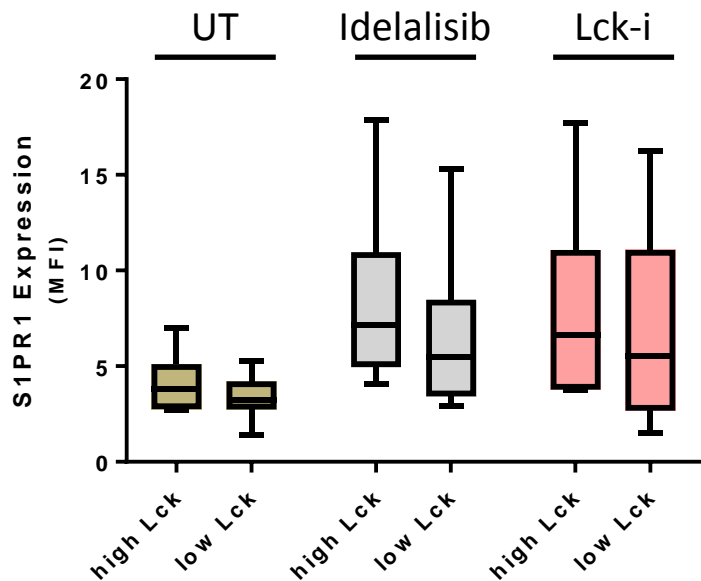**b**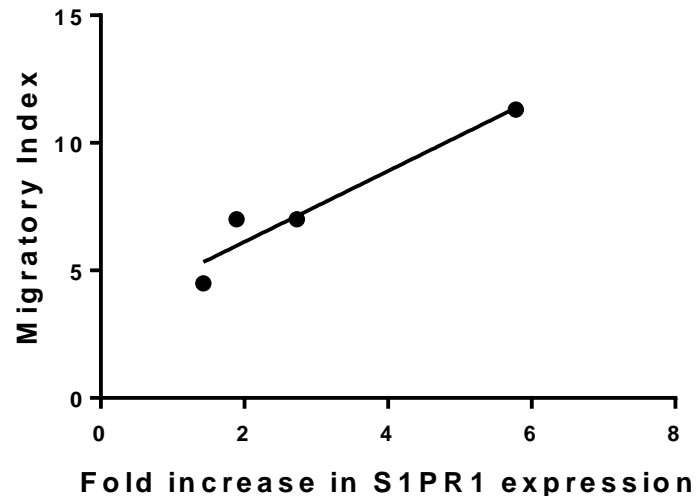

**Supplementary Figure 2.** Relationship between Lck and S1PR1 expression. a.) S1PR1 expression on CLL cells, cultured for 16h with either idelalisib (1  $\mu$ M), Lck-i (1 $\mu$ M) or left untreated, was determined by flow cytometry and compared between cells expressing high (n=6) and low (n=10) levels of Lck. b.) Correlation between CLL cell migration (presented as migration index) to S1P and fold increase in S1PR1 expression in cells treated with Lck-i (1  $\mu$ M) for 16h.
